# Supplementary material
Source: publisher figshare collection journal article supplement (https://sage.figshare.com/ndownloader/files/16986731)

**Gender Differences in Critical Digital Political Engagement in China:  
The Consequences for Protest Attitudes**

Kevin Wagner, Jason Gainous, and Jason Abbott

June 2019

**Online Supplement/Appendix for *Social Science Computer Review***

*Variable Operationalization*

(All items were recoded to run the intuitive direction and rescaled to range from 0 through 1 maintaining the original intervals)

- **Female** - (0 = Male, 1 = Female).
- **Traditional Media Trust** - How trustworthy do you think each of the following sources of news are. Then they were asked about: 1) Television, 2) Newspapers (Very trustworthy, Somewhat trustworthy, Somewhat untrustworthy, and Very untrustworthy).
- **Age** - How old are you?
- **Internet Use** - About how many hours a **day** would you estimate you spend checking email, reading websites, or using social media (social media means applications like Weibo, QQ, Renren, Kaixin001, Douban, WeChat or other sites and services that allow users to interact with each other) either with a computer or on a mobile device? (0-1, 1-2, 2-3, 3-4, 4-5, 5-6, 6-7, 7-8, 8-9, More than 9).
- **Urbanicity** - Which of these best describes the place in which you live? (Countryside/village, Small city, Mid-sized city, Suburban area of a big city, Big city).
- **SES** - Additive index of the following two items after each was rescaled to range from 0-1: 1) What is the highest level of education you have obtained? (No formal education, Primary, Middle school, High school, University, Advanced studies/Graduate school), 2) Here is a table showing the range of monthly incomes that people have. Which of the letters on this table best represents the total monthly income of your household (after tax)? (0-3000, 3000-6000, 6000-10000, 10000-15000, 15000-25000, 25000-40000, More than 40000)
- **Han** - With which ethnic group do you think of yourself as? (Han, Zhuang, Hui, Manchu, Uyghur, Miao, Yi, Tujia, Tibetan, Mongol, Other). Dummy (0 = Other Ethnicity, 1 = Han).

Comparing our Sample to Population  
Demographics

|                          | Our Sample  | Chinese Census |
|--------------------------|-------------|----------------|
| <u>Income</u>            |             |                |
| 1 <sup>st</sup> Quintile | 0-6000      | 0-5000         |
| 2 <sup>nd</sup> Quintile | 6000-10000  | 5000-11000     |
| 3 <sup>rd</sup> Quintile | 10000-15000 | 11000-18000    |
| 4 <sup>th</sup> Quintile | 15000-25000 | 18000-27000    |
| 5 <sup>th</sup> Quintile | >25000      | >27000         |
| <u>Age</u>               |             |                |
| 1 <sup>st</sup> Quintile | <27         | <28            |
| 2 <sup>nd</sup> Quintile | 27-31       | 28-37          |
| 3 <sup>rd</sup> Quintile | 32-35       | 38-45          |
| 4 <sup>th</sup> Quintile | 36-42       | 46-57          |
| 5 <sup>th</sup> Quintile | >42         | >58            |
| <u>Education</u>         |             |                |
| No Primary               | 0.2%        | 5.3%           |
| Primary                  | 0.2%        | 24.5%          |
| Middle                   | 2.1%        | 43.6%          |
| High                     | 11.6%       | 15.4%          |
| College                  | 79.2%       | 10.8%          |
| Post-Graduate            | 6.6%        | --             |
| <u>Sex</u>               |             |                |
| Male                     | 52.5%       | 50.6%          |
| Female                   | 47.5%       | 49.4%          |

**Note:** Census data were obtained from the 2015 Chinese Statistical Yearbook. Quintile cell values represent the cut points. Income is in yuan. Post-graduate is excluded in the Statistical Yearbook data because they do not report this category. It is grouped into college or higher.

Plotting the Kernel Density Estimates against the Normal Density Estimates for Models in Tables 1 and 2

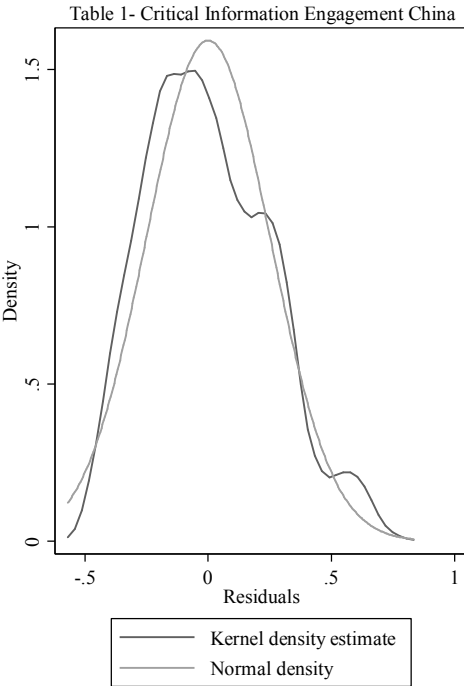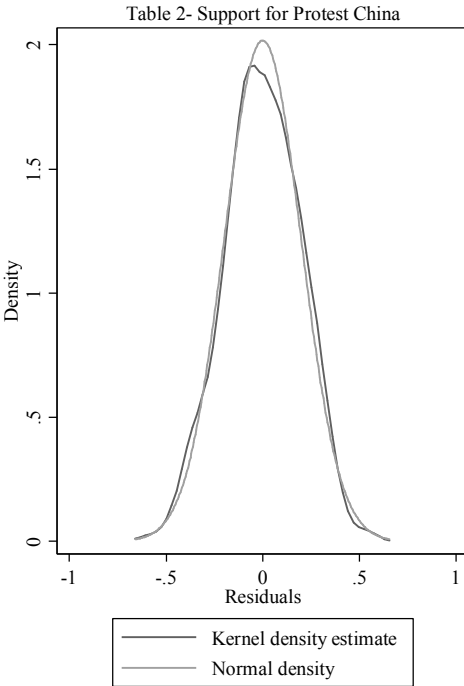

Supplement: Supplementary file 1 [file 16986731]
